# Supplementary material for: Controlling red upconversion luminescence in Gd2O3:Yb3+–Er3+nanoparticles by changing the different atmosphere
Source: Royal Society of Chemistry journal article supplement (doi:10.1039/c6ra22754f), 2016-01-01
Supplement: c6ra22754f1.pdf [file c6ra22754f1.pdf]

## Supporting Information

### Controlling red upconversion luminescence for $\text{Gd}_2\text{O}_2\text{:Yb}^{3+}\text{-Er}^{3+}$ nanoparticles via atmosphere

Shengjun Zhang<sup>a</sup>, Jiajia Zhou<sup>a, b, \*</sup>, Ruozhen Wu<sup>a</sup>, Lei Lei<sup>a</sup>, Zhen Xiao<sup>a</sup>, Junjie Zhang<sup>a</sup>, Shiqing Xu<sup>a, \*</sup>

<sup>a</sup> College of Materials Science and Engineering, China Jiliang University, Hangzhou 310018, China.

<sup>b</sup> College of Optical Science and Engineering, State Key Laboratory of Modern Optical Instrumentation, Zhejiang University, Hangzhou 310027, China.

\*To whom correspondence should be addressed: E-mail: [zhzz85@zju.edu.cn](mailto:zhzz85@zju.edu.cn) and [shiqingxu75@163.com](mailto:shiqingxu75@163.com)

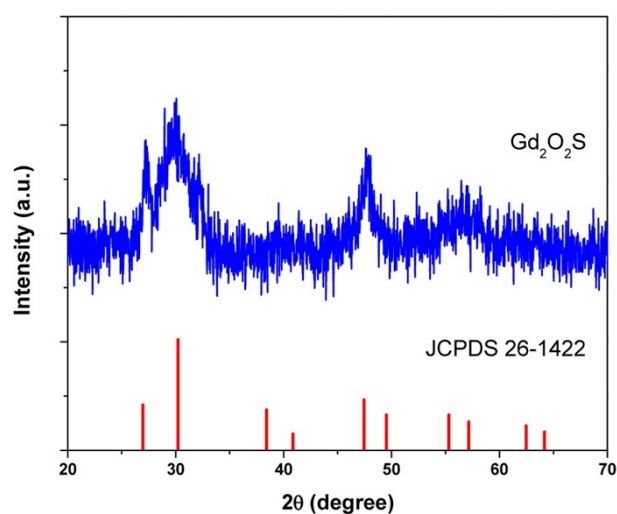

Fig. S1 XRD pattern of the  $\text{Gd}_2\text{O}_2\text{S:9\%Yb}^{3+}\text{-1\%Er}^{3+}$ .

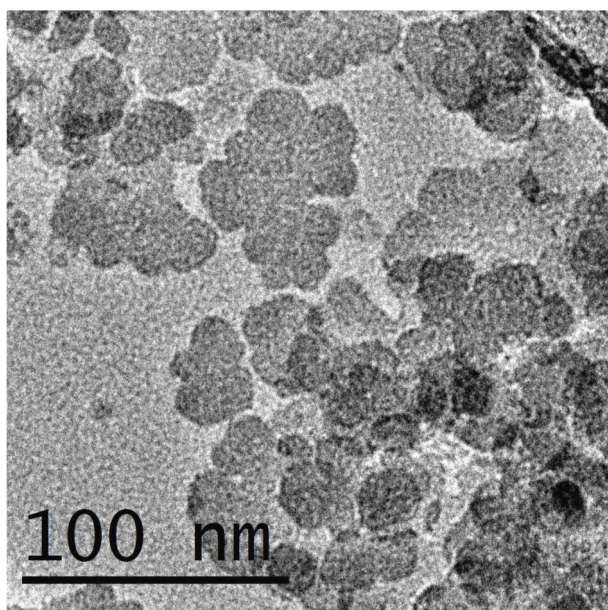

Fig. S2 TEM image of  $\text{Gd}_2\text{O}_2\text{S}: 9\% \text{Yb}^{3+} - 1\% \text{Er}^{3+}$ .
